# Supplementary material
Source: publisher site journal article supplement (https://www.spandidos-publications.com/3938/downloadSupplementary)

Figure S1. Trans-(±)-kusunokinin induces apoptosis. (A) A2780 treated with 8.75  $\mu$ M trans-(±)-kusunokinin for 24, 48 and 72 h, (B) before the percentage of live cells, early apoptotic, late apoptotic/dead and total apoptotic A2780 cells compared with that of non-treated cells at 24, 48 and 72 h was quantified. (C) A2780cis cells were treated with 3.25  $\mu$ M trans-(±)-kusunokinin for 24, 48 and 72 h, (D) before the percentage of live cells, early apoptotic, late apoptotic/dead and total apoptotic A2780cis cells compared with that of non-treated cells at 24, 48 and 72 h was quantified. All data represent the mean  $\pm$  SD. n=3. The unpaired Student's t-test was used for the consideration of P-values. \*P<0.05 vs. no treatment. A2780cis, cisplatin-resistant A2780 cells.

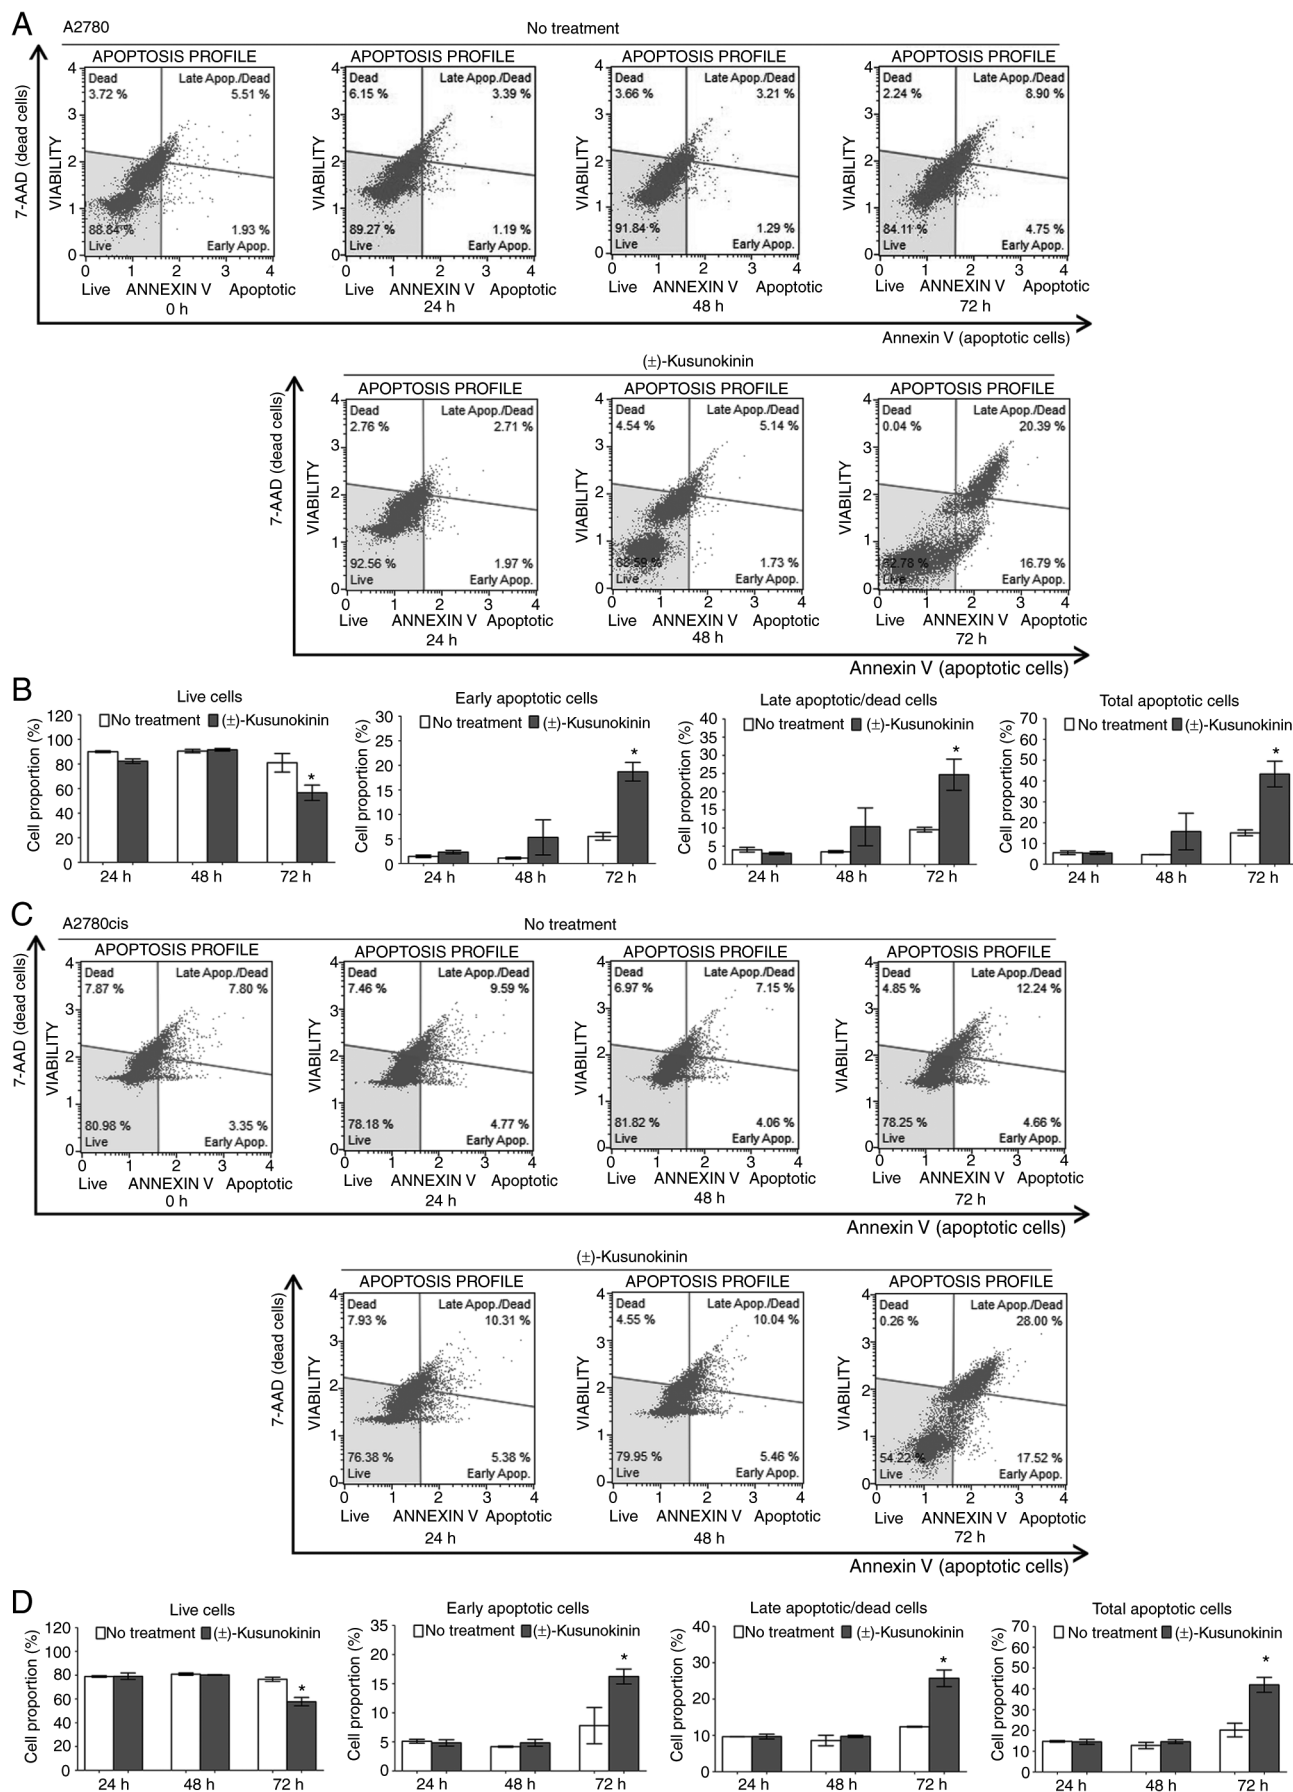

Figure S2. Trans-(±)-kusunokinin stimulates multi-caspase activity. (A) A2780 treated with IC<sub>50</sub> values of trans-(±)-kusunokinin for 24, 48 and 72 h, (B) before the percentage of live cells, caspase+, caspase+/dead, dead and total caspase (caspase+ and caspase+/dead) A2780 cells compared with that of non-treated cells at 24, 48 and 72 h was quantified. (C) A2780cis cells were treated with IC<sub>50</sub> values of trans-(±)-kusunokinin for 24, 48 and 72 h, (D) before the percentage of live cells, caspase+, caspase+/dead, dead and total caspase (caspase+ and caspase+/dead) A2780cis cells compared with that of non-treated cells at 24, 48 and 72 h was quantified. All data represent the mean ± SD. n=3. The unpaired Student's t-test was used for the consideration of P-values. \*P<0.05 vs. no treatment. A2780cis, cisplatin-resistant A2780 cells.

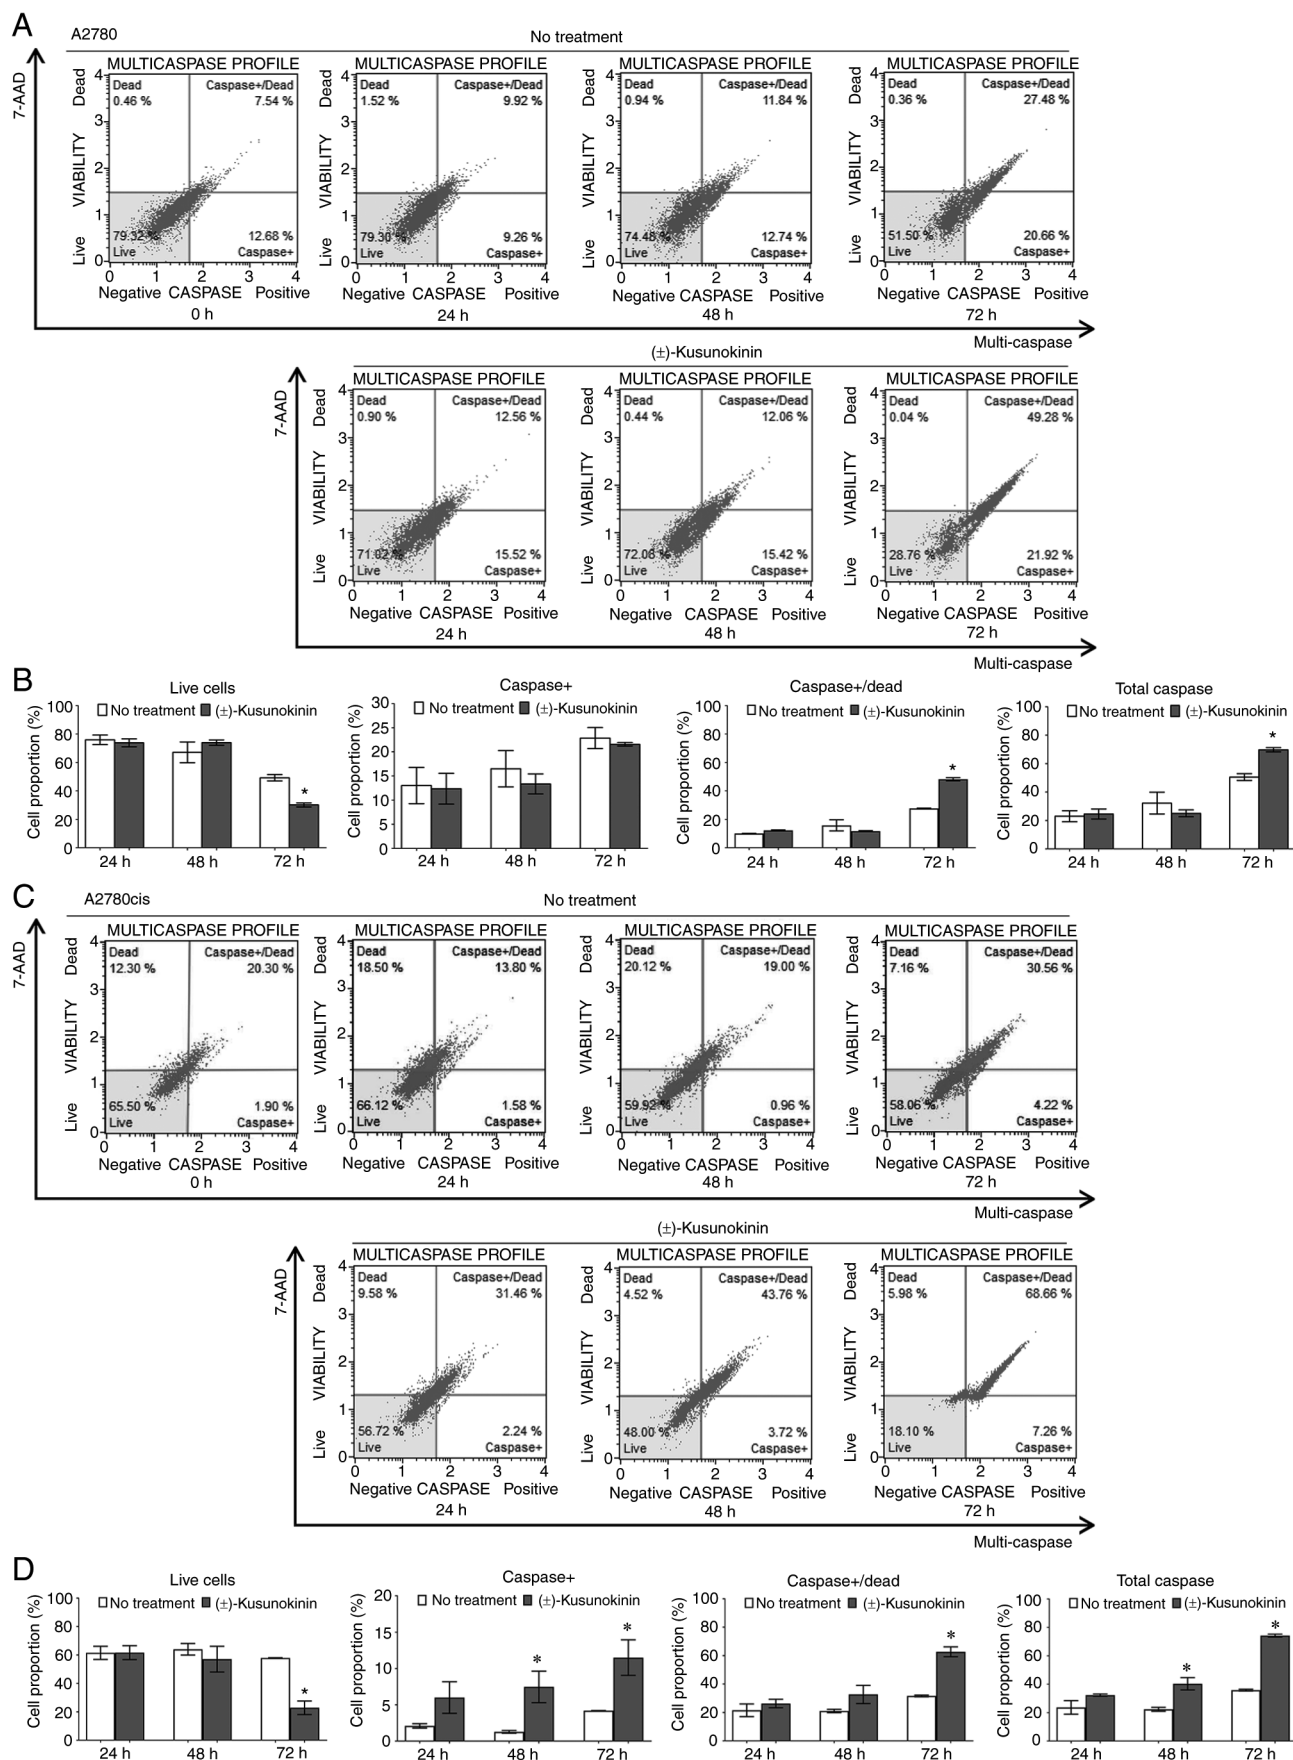

Figure S3. Target proteins of trans-(±)-kusunokinin. (A) CSF1R (175 kDa) and AKR1B1 (36 kDa) expression were detected in A2780 and A2780cis cells using western blot analysis. (B) Protein levels were quantified following normalization to GAPDH band intensities. All data represent the mean  $\pm$  SD. n=3. The unpaired Student's t-test was used for the consideration of P-values. \*P<0.05 vs. A2780. A2780cis, cisplatin-resistant A2780 cells; CSF1R, colony stimulating factor 1 receptor; AKR1B1, aldo-keto reductase family 1 member B.

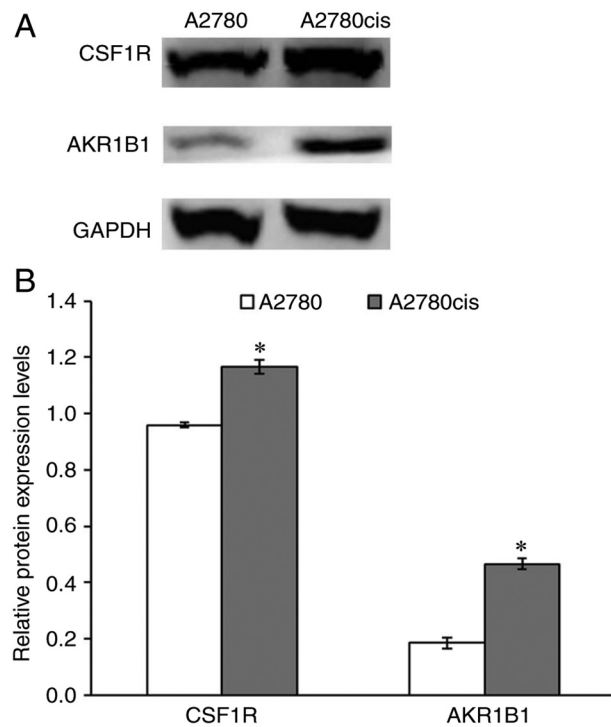

Supplement: Supplementary file 1 [file downloadSupplementary]
